# Supplementary material for: Clinical Outcome and Prognostic Factors of Pancreatic Adenosquamous Carcinoma Compared to Ductal Adenocarcinoma—Results from the German Cancer Registry Group
Source: Cancers (Basel). 2022 Aug 16;14(16):3946. doi: 10.3390/cancers14163946 (PMC9406158; doi:10.3390/cancers14163946)
Supplement: Supplementary file 1 [file cancers-14-03946-s001.zip › cancers-1873728-supplementary.pdf]

## Supplementary Figure S1

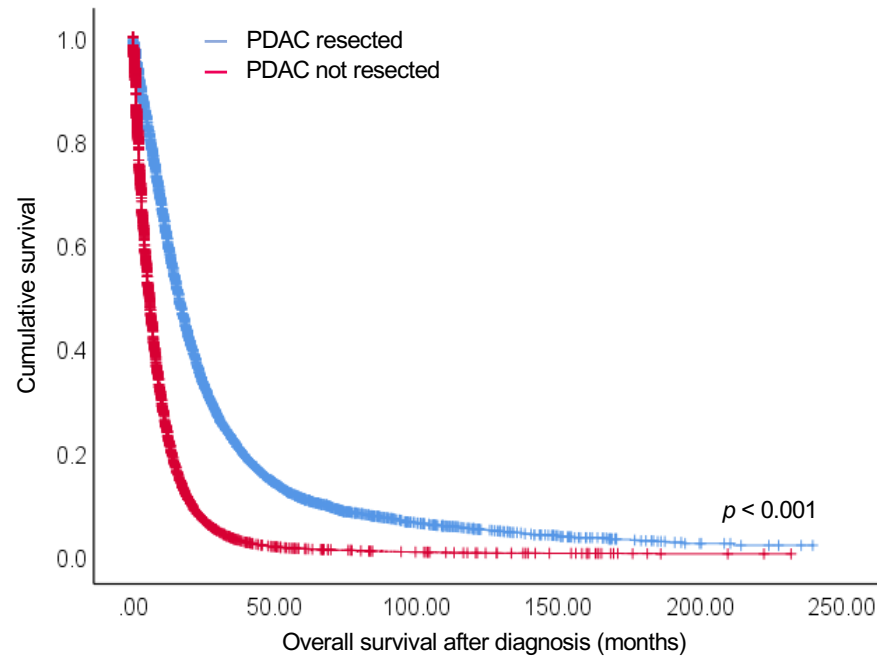

**Supplementary Figure S1:** Survival curve of resected PDAC patients compared to not resected PDAC patients. Median overall survival of resected PDAC patients (16.17 months; 95% CI 15.78 – 16.55 months) was significantly longer compared with unresected PDAC patients (5.73 months; 95% CI 5.62 – 5.84 months).

## Supplementary Figure S2

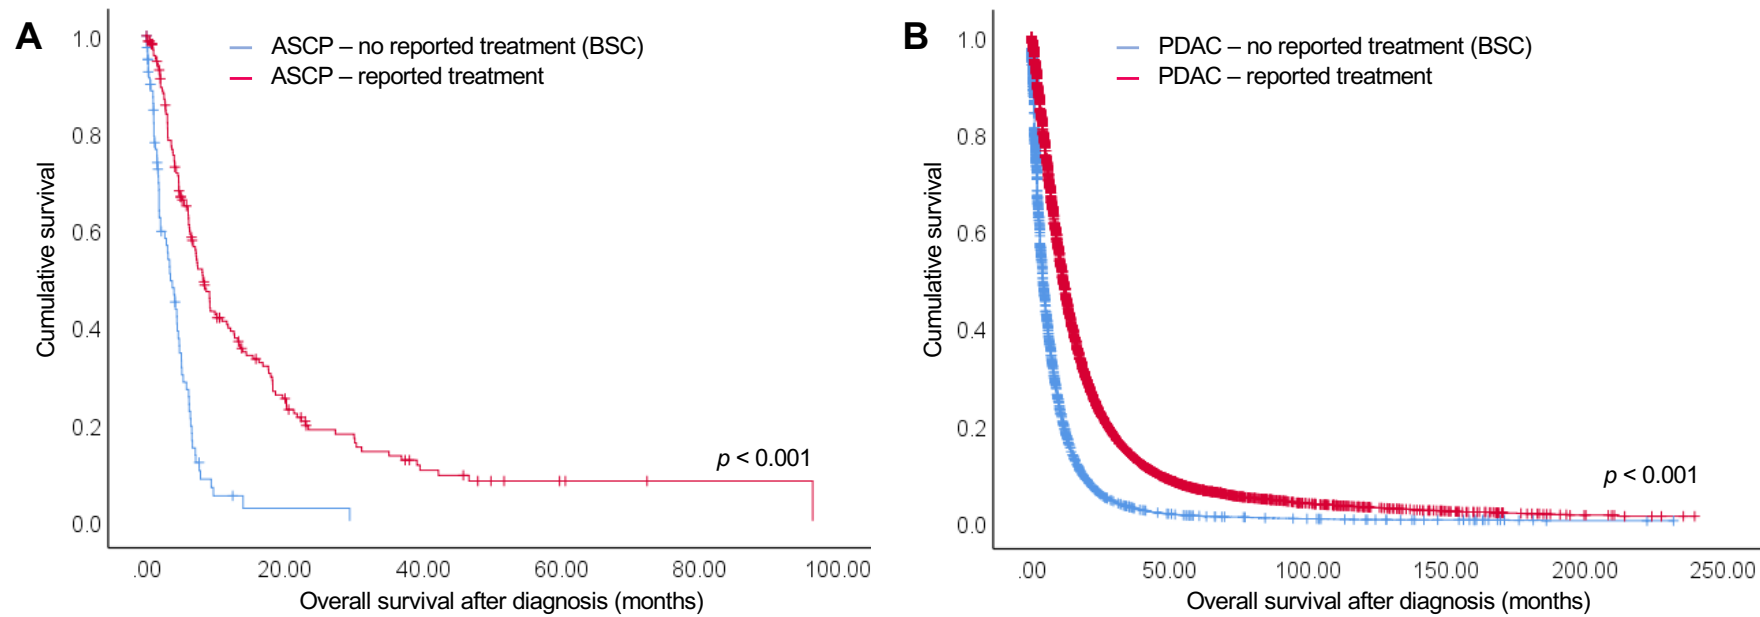

**Supplementary Figure S2:** Survival curves of (A) ASCP and (B) PDAC patients with and without reported treatment (best supportive care, BSC). Median overall survival in the subgroup of patients with no reported specific cancer treatment compared to those with reported treatment was significantly shorter with (A) only 3.47 (95% CI 2.35 – 4.59) compared to 8.13 (95% CI 6.74 – 9.53) for ASCP patients and (B) 4.1 (95% CI 3.97 – 4.23) compared to 11.3 (95% CI 11.10 – 11.50) months for PDAC patients.

## Supplementary Table S1

| Parameter                          | ASCP                 |         | PDAC                |         | ASCP + PDAC         |         |
|------------------------------------|----------------------|---------|---------------------|---------|---------------------|---------|
|                                    | HR (95% CI)          | p-value | HR (95% CI)         | p-value | HR (95% CI)         | p-value |
| Histology (ASCP vs PDAC)           |                      |         |                     |         | 1.303 (1.013-1.677) | 0.039   |
| Sex (male vs female)               | 0.867 (0.497-1.512)  | 0.165   | 1.048 (0.986-1.114) | 0.954   | 1.044 (0.982-1.109) | 0.166   |
| Age (> 65 years vs ≤ 65)           | 1.399 (0.764-2.562)  | 0.267   | 1.265 (1.186-1.348) | <0.001  | 1.265 (1.187-1.348) | <0.001  |
| Distant metastases (M1 vs M0)      | 3.436 (1.354-8.856)  | 0.010   | 1.614 (1.453-1.793) | <0.001  | 1.625 (1.464-1.804) | <0.001  |
| T-stage (T4 vs T2/T3)              | 0.407 (0.49-3.356)   | 0.404   | 1.013 (0.848-1.209) | 0.890   | 0.997 (0.836-1.190) | 0.976   |
| Lymph node metastases (N+ vs N0)   | 1.115 (0.590-2.105)  | 0.738   | 1.499 (1.392-1.615) | <0.001  | 1.497 (1.391-1.611) | <0.001  |
| Lymph vessel invasion (L1 vs L0)   | 1.313 (0.744-2.316)  | 0.384   | 1.169 (1.089-1.254) | <0.001  | 1.172 (1.093-1.256) | <0.001  |
| Blood vessel invasion (V1 vs V0)   | 1.793 (0.957-3.359)  | 0.068   | 1.160 (1.078-1.248) | <0.001  | 1.166 (1.084-1.254) | <0.001  |
| Resection margin status (R+ vs R0) | 1.711 (0.974-3.007)  | 0.062   | 1.487 (1.388-1.592) | <0.001  | 1.487 (1.389-1.592) | <0.001  |
| Grading (G3/G4 vs G1/G2)           | 0.942 (0.509 -1.744) | 0.850   | 1.412 (1.327-1.502) | <0.001  | 1.405 (1.321-1.495) | <0.001  |
| Adjuvant therapy (no vs yes)       | 5.361 (2.858-10.055) | <0.001  | 1.871 (1.758-1.990) | <0.001  | 1.894 (1.781-2.014) | <0.001  |

**Supplementary Table S1: Multivariate Cox regression analysis for survival of resected ASCP and PDAC patients including all parameters and compared groups.** ASCP – adenosquamous carcinoma of the pancreas; CI – confidence interval; HR – hazard ratio; PDAC – pancreatic ductal adenocarcinoma.

## Supplementary Table S2

| Parameter               | ASCP |        |                                    |         | PDAC  |        |                                    |         | ASCP + PDAC |        |                                    |         |
|-------------------------|------|--------|------------------------------------|---------|-------|--------|------------------------------------|---------|-------------|--------|------------------------------------|---------|
|                         | N    | Deaths | Median survival in months (95% CI) | p-value | N     | Deaths | Median survival in months (95% CI) | p-value | N           | Deaths | Median survival in months (95% CI) | p-value |
| Overall                 | 134  | 100    | 11.80 (8.20-15.40)                 |         | 11965 | 9136   | 16.17 (15.78-16.55)                |         | 12099       | 2863   | 16.17 (15.79-16.55)                |         |
| Histology               |      |        |                                    |         |       |        |                                    |         |             |        |                                    |         |
| ASCP                    |      |        |                                    |         |       |        |                                    |         | 134         | 100    | 11.80 (8.20-15.40)                 | 0.007   |
| PDAC                    |      |        |                                    |         |       |        |                                    |         | 11965       | 9136   | 16.17 (15.78-16.55)                |         |
| Sex                     |      |        |                                    |         |       |        |                                    |         |             |        |                                    |         |
| male                    | 76   | 61     | 9.16 (3.21-15.13)                  | 0.998   | 6374  | 4900   | 15.47 (14.99-15.95)                | 0.051   | 6450        | 4961   | 15.40 (14.92-15.88)                | 0.049   |
| female                  | 58   | 39     | 12.73 (7.48-17.98)                 |         | 5591  | 4236   | 16.63 (16.07-17.20)                |         | 5649        | 4275   | 16.57 (16.00-17.13)                |         |
| Age (years)             |      |        |                                    |         |       |        |                                    |         |             |        |                                    |         |
| ≤65                     | 49   | 36     | 13.23 (3.75-22.72)                 | 0.497   | 4686  | 3517   | 18.40 (17.66-19.14)                | <0.001  | 4735        | 3553   | 18.37 (17.64-19.09)                | <0.001  |
| >65                     | 85   | 64     | 9.17 (3.57-14.77)                  |         | 7279  | 5619   | 14.43 (13.99-14.88)                |         | 7364        | 5683   | 14.40 (13.96-14.84)                |         |
| Distant metastasis      |      |        |                                    |         |       |        |                                    |         |             |        |                                    |         |
| M0                      | 111  | 78     | 13.43 (7.22-19.65)                 | 0.002   | 9499  | 6962   | 18.40 (17.89-18.91)                | <0.001  | 9610        | 7040   | 18.37 (17.87-18.86)                | <0.001  |
| M1                      | 19   | 18     | 6.03 (3.85-8.21)                   |         | 1784  | 1606   | 7.20 (6.69-7.71)                   |         | 1803        | 1624   | 7.20 (6.70-7.70)                   |         |
| T-stage                 |      |        |                                    |         |       |        |                                    |         |             |        |                                    |         |
| pT0                     | 0    | 0      |                                    |         | 23    | 7      | 56.53 (0.00-126.69)                | <0.001  | 23          | 7      | 56.53 (0.00-126.69)                | <0.001  |
| pT1                     | 0    | 0      |                                    |         | 406   | 259    | 34.17 (28.38-39.95)                |         | 406         | 259    | 34.17 (28.38-39.95)                |         |
| pT2/3                   | 127  | 95     | 12.17 (8.60-15.73)                 | 0.979   | 10303 | 7877   | 16.33 (15.92-16.75)                |         | 10430       | 7972   | 16.30 (15.89-16.72)                |         |
| pT4                     | 6    | 4      | 6.07 (1.23-10.91)                  |         | 829   | 737    | 8.90 (8.15-9.65)                   |         | 835         | 741    | 8.83 (8.11-9.56)                   |         |
| Lymph node metastases   |      |        |                                    |         |       |        |                                    |         |             |        |                                    |         |
| N0                      | 40   | 28     | 14.43 (8.38-20.49)                 | 0.064   | 3610  | 2491   | 22.20 (21.18-23.22)                | <0.001  | 3650        | 2519   | 22.10 (21.08-23.12)                | <0.001  |
| N+                      | 93   | 71     | 9.17 (5.01-13.32)                  |         | 8020  | 6371   | 14.23 (13.82 - 14.64)              |         | 8113        | 6442   | 14.23 (13.82-14.64)                |         |
| Lymph vessel invasion   |      |        |                                    |         |       |        |                                    |         |             |        |                                    |         |
| L0                      | 45   | 29     | 18.67 (15.85-21.48)                | 0.096   | 3252  | 1975   | 22.83 (21.79-23.88)                | <0.001  | 3297        | 2004   | 22.63 (21.59-23.68)                | <0.001  |
| L1                      | 66   | 48     | 9.23 (4.26-14.20)                  |         | 4850  | 3642   | 15.87 (15.30-16.43)                |         | 4916        | 3690   | 15.80 (15.24-16.36)                |         |
| Blood vessel invasion   |      |        |                                    |         |       |        |                                    |         |             |        |                                    |         |
| V0                      | 70   | 49     | 17.63 (13.43-21.84)                | 0.031   | 5871  | 3947   | 19.93 (19.29-20.58)                | <0.001  | 5941        | 3996   | 19.83 (19.19-20.48)                | <0.001  |
| V1                      | 40   | 28     | 8.10 (4.89-11.306)                 |         | 1958  | 1440   | 13.47 (12.70-14.24)                |         | 1998        | 1468   | 13.27 (12.50-14.03)                |         |
| Resection margin status |      |        |                                    |         |       |        |                                    |         |             |        |                                    |         |
| R0                      | 75   | 53     | 13.50 (9.97-17.03)                 | 0.369   | 6089  | 4162   | 21.00 (20.31-21.69)                | <0.001  | 6164        | 4215   | 20.87 (20.18-21.55)                | <0.001  |
| R+                      | 28   | 19     | 9.17 (0.00-28.13)                  |         | 2355  | 1793   | 13.23 (12.61-13.85)                |         | 2383        | 1812   | 13.23 (12.60-13.86)                |         |
| Grading                 |      |        |                                    |         |       |        |                                    |         |             |        |                                    |         |
| G1/G2                   | 38   | 27     | 11.80 (2.26-21.34)                 | 0.508   | 6021  | 4397   | 19.87 (19.21-20.52)                | <0.001  | 6059        | 4424   | 19.83 (19.18-20.48)                | <0.001  |
| G3/G4                   | 89   | 66     | 10.90 (4.50-17.30)                 |         | 4943  | 3956   | 12.60 (12.16-13.04)                |         | 5032        | 4022   | 12.60 (12.16-13.04)                |         |
| Adjuvant Therapy        |      |        |                                    |         |       |        |                                    |         |             |        |                                    |         |
| Yes                     | 48   | 30     | 22.37 (14.48-30.25)                | <0.001  | 4973  | 3525   | 21.57 (20.92-22.22)                | <0.001  | 5021        | 3555   | 21.57 (20.92-22.21)                | <0.001  |
| No                      | 86   | 70     | 6.03 (4.56-7.51)                   |         | 6992  | 5611   | 12.17 (11.71-12.62)                |         | 7078        | 5681   | 12.07 (11.62-16.55)                |         |

**Supplementary Table S2: Survival analysis including all parameters and compared groups of ASCP and PDAC patients.** ASCP – adenosquamous carcinoma of the pancreas; CI – confidence interval; N – number; PDAC – pancreatic ductal adenocarcinoma.
